# Supplementary material for: Mutational meltdown of microbial altruists in Streptomyces coelicolor colonies
Source: Research Square preprint supplement (doi:10.21203/rs.3.rs-101912/v1), 2020-11-23
Supplement: Supplementary file 1 [file 5ff2cb4bb94cf150f7a3b09a.xlsx]

## Sheet: Mutation S1
Table S1. Accumulated mutations in wild-type lineages during the experiment.
Lineage	Transfer	Region	Type	Reference	Allele	Count	Coverage	Frequency	Coding region change	Amino acid change	Non-synonymous	Mutation type	Gene	Gene product
W1	27	221017	SNV	C	G	46	73	63.0137			-	G:C>C:G
		2208542	SNV	G	A	122	124	98.3871	NP_626320.1:c.272C>T	NP_626320.1:p.Ala91Val	Yes	G:C>A:T	SCO2060	integral membrane transport protein
		2349467	SNV	A	C	166	168	98.8095	NP_626436.1:c.728A>C	NP_626436.1:p.Glu243Ala	Yes	A:T>C:G	SCO2183	2-oxoacid dehydrogenase subunit E1
		2462887..2462888	Deletion	GG	-	100	161	62.1118			-	Deletion	rnpB
		4148255	SNV	G	C	15	30	50			-	G:C>C:G
		8355042	SNV	C	T	87	87	100	NP_631579.1:c.308C>T	NP_631579.1:p.Ser103Leu	Yes	G:C>A:T	SCO7535	lipoprotein
W2	27	221017	SNV	C	G	35	61	57.377			-	G:C>C:G
		4744885	SNV	C	G	199	204	97.549	NP_628502.1:c.2109C>G	NP_628502.1:p.Asp703Glu	Yes	G:C>C:G	SCO4331	hypothetical protein
		5939426	SNV	G	C	118	119	99.1597	NP_629591.1:c.152G>C	NP_629591.1:p.Gly51Ala	Yes	G:C>C:G	SCO5454	two-component system sensor kinase
		6176177^6176178	Insertion	-	G	52	96	54.1667			-	Insertion
		7313624	Deletion	C	-	21	39	53.8462			-	Deletion
W3	7	2458948^2458949	Insertion	-	C	69	107	64.486			-	Insertion
W4	27	221017	SNV	C	G	41	73	56.1644			-	G:C>C:G
		3739268	SNV	G	A	226	226	100			-	G:C>A:T
		7988760	SNV	A	G	57	57	100			-	A:T>G:C
		8613917	SNV	C	T	70	70	100	NP_631818.1:c.129G>A		No	G:C>A:T	SCO7788	hypothetical protein
W5	27	373226	SNV	G	C	5	9	55.5556	NP_624691.1:c.182G>C	NP_624691.1:p.Ser61Thr	Yes	G:C>C:G	SCO0368	transposase
		1650273	SNV	A	G	127	128	99.2188			-	A:T>G:C
		2458948^2458949	Insertion	-	C	75	126	59.5238			-	Insertion
		2462887	Deletion	G	-	75	124	60.4839			-	Deletion	rnpB
		4938336	SNV	C	A	308	309	99.6764	NP_628680.1:c.185G>T	NP_628680.1:p.Arg62Leu	Yes	G:C>T:A	SCO4516	hypothetical protein
		5371295	SNV	G	T	167	168	99.4048	NP_629088.1:c.1227G>T		No	G:C>T:A	SCO4935	hypothetical protein
		8424413	SNV	G	A	18	18	100	NP_631639.1:c.465C>T		No	G:C>A:T	SCO7597	hypothetical protein
		8424416	SNV	G	A	17	17	100	NP_631639.1:c.462C>T		No	G:C>A:T	SCO7597	hypothetical protein
		8424506	SNV	A	G	19	19	100	NP_631639.1:c.372T>C		No	A:T>G:C	SCO7597	hypothetical protein
		8424513	Deletion	G	-	26	26	100	NP_631639.1:c.365delC	NP_631639.1:p.Ala122fs	Yes	Deletion	SCO7597	hypothetical protein
W6	27	221017	SNV	C	G	51	77	66.2338			-	G:C>C:G
		6769943	SNV	G	C	15	28	53.5714	NP_630271.1:c.536G>C	NP_630271.1:p.Arg179Pro	Yes	G:C>C:G	SCO6167	proline rich protein membrane protein
		7700826	SNV	C	G	67	68	98.5294	NP_631001.1:c.553G>C	NP_631001.1:p.Val185Leu	Yes	G:C>C:G	SCO6935	hypothetical protein

## Sheet: Mutation S2
Table S2. Accumulated mutations in mutant lineages during the experiment.
Lineage	Transfer	Region	Type	Reference	Allele	Count	Coverage	Frequency	Coding region change	Amino acid change	Non-synonymous	Mutation type	Gene	Gene product
M1	25	481270	SNV	G	A	239	241	99.1701	NP_624779.1:c.259G>A	NP_624779.1:p.Ala87Thr	Yes	G:C>A:T	SCO0459	hypothetical protein
		712725	SNV	C	T	186	188	98.9362	NP_624982.1:c.12G>A		No	G:C>A:T	SCO0673	hypothetical protein
		1134186	SNV	C	T	156	156	100	NP_625368.1:c.30C>T		No	G:C>A:T	SCO1074	hypothetical protein
		1467045	SNV	G	A	164	165	99.3939	NP_625671.1:c.717C>T		No	G:C>A:T	SCO1388	mannose-1-phosphate guanyltransferase
		1503926	SNV	C	T	179	183	97.8142	NP_625691.1:c.394G>A	NP_625691.1:p.Val132Met	Yes	G:C>A:T	SCO1409	hypothetical protein
		1615858	SNV	C	T	145	146	99.3151	NP_733536.1:c.559C>T	NP_733536.1:p.His187Tyr	Yes	G:C>A:T	SCO1511	hypothetical protein
		1811018	SNV	G	T	185	185	100	NP_625965.1:c.369C>A		No	G:C>T:A	SCO1691	TetR family transcriptional regulator
		1906862	SNV	G	T	150	150	100	NP_626052.1:c.367C>A		No	G:C>T:A	ppnK	inorganic polyphosphate/ATP-NAD kinase
		2119778	SNV	G	A	140	141	99.2908	NP_626243.1:c.19G>A	NP_626243.1:p.Val7Ile	Yes	G:C>A:T	SCO1981	hypothetical protein
		2458948^2458949	Insertion	-	C	83	138	60.1449			-	Insertion
		2489834	SNV	C	G	159	160	99.375	NP_626565.1:c.221G>C	NP_626565.1:p.Gly74Ala	Yes	G:C>C:G	SCO2318	glycosyl transferase
		2884357	SNV	G	C	170	172	98.8372	NP_626888.1:c.274G>C	NP_626888.1:p.Ala92Pro	Yes	G:C>C:G	SCO2652	hypothetical protein
		2968251	SNV	C	A	154	154	100	NP_626956.1:c.1936G>T	NP_626956.1:p.Glu646*	Yes	G:C>T:A	SCO2723	ABC transporter ATP-binding protein
		3345283	SNV	C	A	174	178	97.7528	NP_627273.1:c.864C>A		No	G:C>T:A	SCO3052	UDP-glucose 6-dehydrogenase
		4040725	SNV	G	T	147	147	100	NP_733613.1:c.2323C>A		No	G:C>T:A	SCO3661	ATP-dependent protease ATP-binding subunit
		4127767	SNV	G	T	51	100	51	NP_733616.1:c.212C>A	NP_733616.1:p.Ala71Asp	Yes	G:C>T:A	SCO3754	ABC transporter
		4148505	SNV	T	C	24	25	96			-	A:T>G:C
		4532381	SNV	T	C	116	118	98.3051			-	A:T>G:C
		4732128	SNV	C	G	171	172	99.4186	NP_628492.1:c.2546G>C	NP_628492.1:p.Arg849Pro	Yes	G:C>C:G	SCO4321	hypothetical protein
		5777386	SNV	C	T	164	164	100	NP_629446.1:c.489G>A		No	G:C>A:T	SCO5304	sensor-like histidine kinase
		5840932	SNV	C	G	175	183	95.6284	NP_629510.1:c.762C>G		No	G:C>C:G	SCO5371	F0F1 ATP synthase subunit alpha
		5960922	SNV	C	A	145	145	100			-	G:C>T:A
		6203952	SNV	C	G	144	144	100	NP_629822.1:c.31C>G	NP_629822.1:p.Pro11Ala	Yes	G:C>C:G	SCO5694	1-deoxy-D-xylulose 5-phosphate reductoisomerase
		6371032	SNV	C	A	186	186	100	NP_629945.1:c.27C>A		No	G:C>T:A	SCO5822	DNA topoisomerase IV subunit B
		6629123	SNV	G	C	153	155	98.7097	NP_630149.1:c.509C>G	NP_630149.1:p.Ala170Gly	Yes	G:C>C:G	SCO6038	hypothetical protein
		6960345	SNV	G	C	173	174	99.4253	NP_630397.1:c.1466C>G	NP_630397.1:p.Thr489Ser	Yes	G:C>C:G	SCO6300	hydrolase
		6972333	SNV	G	C	145	146	99.3151	NP_630409.1:c.343C>G	NP_630409.1:p.Pro115Ala	Yes	G:C>C:G	SCO6312	transcriptional regulator
		7009564	Deletion	G	-	144	145	99.3103	NP_630440.1:c.1329delC	NP_630440.1:p.Ala444fs	Yes	Deletion	SCO6348	hypothetical protein
		7009566	SNV	C	T	144	145	99.3103	NP_630440.1:c.1327G>A	NP_630440.1:p.Val443Ile	Yes	G:C>A:T	SCO6348	hypothetical protein
		7101047	SNV	G	T	165	165	100	NP_630514.1:c.3465C>A		No	G:C>T:A	SCO6428	hypothetical protein
		7271648	SNV	G	A	148	148	100	NP_630648.1:c.546G>A		No	G:C>A:T	SCO6568	ABC transporter
		7547616	SNV	G	C	168	170	98.8235	NP_630861.1:c.394G>C	NP_630861.1:p.Val132Leu	Yes	G:C>C:G	SCO6789	fatty oxidation protein
		7559869	SNV	G	A	156	156	100	NP_630871.1:c.240G>A		No	G:C>A:T	tdh	L-threonine 3-dehydrogenase
		7566905	SNV	G	C	162	165	98.1818	NP_630878.1:c.443C>G	NP_630878.1:p.Ala148Gly	Yes	G:C>C:G	SCO6806	phage integrase
		7766466	SNV	C	G	297	300	99	NP_631060.1:c.210C>G		No	G:C>C:G	SCO6995	protease
		7776421	SNV	G	A	320	328	97.561	NP_631068.1:c.752C>T	NP_631068.1:p.Ser251Phe	Yes	G:C>A:T	SCO7003	hypothetical protein
M2	25	1088640	SNV	C	A	127	128	99.2188	NP_625326.1:c.2475G>T		No	G:C>T:A	SCO1031	ABC transporter
		1126417	SNV	G	A	71	136	52.2059			-	G:C>A:T
		1166168	SNV	G	C	104	104	100	NP_625402.1:c.253G>C	NP_625402.1:p.Glu85Gln	Yes	G:C>C:G	SCO1109	oxidoreductase
		1404674	SNV	C	T	150	150	100			-	G:C>A:T
		1432260	SNV	G	A	122	122	100			-	G:C>A:T
		1690052	SNV	C	A	94	96	97.9167	NP_733539.1:c.385G>T	NP_733539.1:p.Ala129Ser	Yes	G:C>T:A	argJ	bifunctional ornithine acetyltransferase/N-acetylglutamate synthase
		1719518	SNV	G	T	103	103	100			-	G:C>T:A
		1807393	SNV	C	T	86	92	93.4783			-	G:C>A:T
		1926842	SNV	C	T	160	160	100	NP_626068.1:c.673G>A	NP_626068.1:p.Val225Ile	Yes	G:C>A:T	SCO1798	ABC transporter ATP-binding protein
		2542975	SNV	G	A	109	109	100			-	G:C>A:T
		2613098	SNV	C	A	180	181	99.4475			-	G:C>T:A
		2758023	SNV	C	T	146	146	100	NP_626796.1:c.440G>A	NP_626796.1:p.Gly147Glu	Yes	G:C>A:T	SCO2558	hypothetical protein
		2864030	SNV	G	A	119	122	97.541	NP_626871.1:c.2329G>A	NP_626871.1:p.Val777Met	Yes	G:C>A:T	SCO2635	aminopeptidase
		2908625	SNV	G	C	91	96	94.7917	NP_626907.1:c.260G>C	NP_626907.1:p.Gly87Ala	Yes	G:C>C:G	SCO2672	hypothetical protein
		2990314	SNV	A	T	115	115	100			-	A:T>T:A
		2993995	SNV	G	C	63	96	65.625	NP_626978.1:c.1005G>C		No	G:C>C:G	SCO2747	bifunctional carbohydrate binding and transport protein
		3282758	SNV	G	C	229	233	98.2833			-	G:C>C:G
		3583178	SNV	G	A	177	178	99.4382	NP_733597.1:c.6444G>A		No	G:C>A:T	SCO3232	CDA peptide synthetase III
		3585292	SNV	C	T	148	150	98.6667	NP_627446.1:c.471C>T		No	G:C>A:T	SCO3234	phosphotransferase
		3796098	SNV	G	T	117	119	98.3193	NP_733604.1:c.1366G>T	NP_733604.1:p.Ala456Ser	Yes	G:C>T:A	SCO3434	DNA polymerase I
		4313821	SNV	T	G	299	299	100			-	A:T>C:G
		4486909	SNV	G	A	173	177	97.7401	NP_628273.1:c.3714C>T		No	G:C>A:T	SCO4092	ATP-dependent helicase
		4617566	SNV	A	G	206	222	92.7928	NP_628383.1:c.293T>C	NP_628383.1:p.Val98Ala	Yes	A:T>G:C	SCO4208	integral membrane transport protein
		4811070	SNV	C	T	144	230	62.6087	NP_628563.1:c.235C>T	NP_628563.1:p.His79Tyr	Yes	G:C>A:T	SCO4394	iron repressor
		5532591	SNV	C	T	195	197	98.9848	NP_629239.1:c.143C>T	NP_629239.1:p.Thr48Ile	Yes	G:C>A:T	SCO5089	actinorhodin polyketide synthase
		5775556	SNV	G	A	202	204	99.0196	NP_629444.1:c.423C>T		No	G:C>A:T	SCO5302	integral membrane cell-cycle protein
		6037691	SNV	C	G	191	192	99.4792	NP_629674.1:c.1064G>C	NP_629674.1:p.Arg355Pro	Yes	G:C>C:G	SCO5540	hypothetical protein
		7129427	SNV	A	T	112	112	100			-	A:T>T:A
		7298296	SNV	C	G	89	89	100	NP_630666.1:c.867C>G		No	G:C>C:G	SCO6587	dehydrogenase
		7406743	SNV	G	C	83	83	100	NP_630741.1:c.909C>G	NP_630741.1:p.Ser303Arg	Yes	G:C>C:G	SCO6666	hypothetical protein
		7634733	SNV	C	A	78	78	100	NP_630934.1:c.946G>T	NP_630934.1:p.Gly316Cys	Yes	G:C>T:A	SCO6864	hypothetical protein
		7645276	SNV	T	A	116	117	99.1453	NP_630946.1:c.131A>T	NP_630946.1:p.Lys44Met	Yes	A:T>T:A	SCO6876	hypothetical protein
		7807060	SNV	G	T	51	52	98.0769	NP_631085.1:c.40G>T	NP_631085.1:p.Gly14Trp	Yes	G:C>T:A	SCO7021	hypothetical protein
M3	25	1072216..1072217	MNV	GA	TC	117	121	96.6942	NP_625312.1:c.328_329delTCinsGA	NP_625312.1:p.Ser110Asp	Yes	G:C>T:A	SCO1016	hypothetical protein
												A:T>C:G
		1252185	SNV	C	T	154	161	95.6522	NP_625474.1:c.7C>T	NP_625474.1:p.Arg3Cys	Yes	G:C>A:T	SCO1184	hypothetical protein
		1344799	SNV	A	C	27	53	50.9434	NP_625561.1:c.653A>C	NP_625561.1:p.His218Pro	Yes	A:T>C:G	SCO1274	hypothetical protein
		1592949	SNV	A	C	58	92	63.0435			-	A:T>C:G
		1719817	SNV	T	G	64	120	53.3333			-	A:T>C:G
		1765203	SNV	A	G	38	74	51.3514			-	A:T>G:C
		1878761	SNV	T	G	63	119	52.9412			-	A:T>C:G
		1878763	SNV	A	G	68	117	58.1197			-	A:T>G:C
		1878792	SNV	T	C	62	121	51.2397			-	A:T>G:C
		2112369	SNV	C	T	131	131	100	NP_626236.1:c.742G>A	NP_626236.1:p.Gly248Ser	Yes	G:C>A:T	SCO1973	hypothetical protein
		2686414	SNV	G	T	179	180	99.4444	NP_626736.1:c.1220C>A	NP_626736.1:p.Pro407Gln	Yes	G:C>T:A	SCO2494	pyruvate phosphate dikinase
		2947470	SNV	A	T	281	282	99.6454			-	A:T>T:A
		4148246	SNV	A	C	11	21	52.381			-	A:T>C:G
		4148252	SNV	A	C	10	20	50			-	A:T>C:G
		4377204^4377205	Insertion	-	G	137	174	78.7356			-	Insertion
		4430625	SNV	A	C	65	130	50			-	A:T>C:G
		4663287	SNV	G	T	158	174	90.8046	NP_628428.1:c.39G>T		No	G:C>T:A	SCO4254	hypothetical protein
		4770844	SNV	A	G	240	240	100	NP_628526.1:c.296T>C	NP_628526.1:p.Leu99Pro	Yes	A:T>G:C	SCO4356	hypothetical protein
		4880312	SNV	C	T	276	281	98.2206			-	G:C>A:T
		5255390	SNV	A	C	103	191	53.9267			-	A:T>C:G
		5612258	SNV	A	G	36	70	51.4286			-	A:T>G:C
		5612260	SNV	T	G	37	70	52.8571			-	A:T>C:G
		5612263	SNV	C	G	47	91	51.6484			-	G:C>C:G
		5830280	SNV	T	C	129	256	50.3906			-	A:T>G:C
		5871569	SNV	C	T	225	226	99.5575	NP_629538.1:c.957C>T		No	G:C>A:T	SCO5399	acetyl-CoA acetyltransferase
		6105201	SNV	C	A	169	169	100	NP_629737.1:c.334C>A	NP_629737.1:p.Leu112Ile	Yes	G:C>T:A	SCO5603	hypothetical protein
		6113723	SNV	G	C	192	193	99.4819	NP_629746.1:c.2170G>C	NP_629746.1:p.Val724Leu	Yes	G:C>C:G	SCO5612	ATP binding protein
		6598610	SNV	A	C	50	99	50.5051			-	A:T>C:G
		6935489	SNV	C	T	142	145	97.931	NP_630376.1:c.983C>T	NP_630376.1:p.Pro328Leu	Yes	G:C>A:T	SCO6278	integral membrane transport protein
		7633600	SNV	C	G	193	193	100	NP_630933.1:c.220G>C	NP_630933.1:p.Ala74Pro	Yes	G:C>C:G	SCO6863	hypothetical protein
		7777209	SNV	G	C	153	154	99.3506			-	G:C>C:G
M4	25	527567	SNV	G	A	160	162	98.7654	NP_624811.1:c.272C>T	NP_624811.1:p.Pro91Leu	Yes	G:C>A:T	SCO0494	iron-siderophore binding lipoprotein
		533965	SNV	C	T	114	114	100	NP_624818.1:c.1800G>A		No	G:C>A:T	SCO0501	hypothetical protein
		738352^738353	Insertion	-	G	71	106	66.9811			-	Insertion
		5056054	SNV	C	G	188	189	99.4709	NP_628793.1:c.227C>G	NP_628793.1:p.Thr76Ser	Yes	G:C>C:G	SCO4632	ATP/GTP binding protein
		5257242	SNV	G	A	172	173	99.422			-	G:C>A:T
		6370279^6370280	Insertion	-	G	48	75	64			-	Insertion
		7595845	SNV	G	A	113	150	75.3333	NP_630898.1:c.2711C>T	NP_630898.1:p.Ala904Val	Yes	G:C>A:T	SCO6827	polyketide synthase
M5	25	2462887	Deletion	G	-	67	108	62.037			-	Deletion	rnpB
		2961862	SNV	G	T	126	126	100	NP_626951.1:c.153C>A		No	G:C>T:A	SCO2718	hypothetical protein
		5203768	SNV	T	C	143	147	97.2789	NP_628940.1:c.29A>G	NP_628940.1:p.Asp10Gly	Yes	A:T>G:C	SCO4782	hypothetical protein
		6769937	SNV	G	C	33	59	55.9322	NP_630271.1:c.530G>C	NP_630271.1:p.Arg177Pro	Yes	G:C>C:G	SCO6167	proline rich protein membrane protein
M6	25	454451^454452	Insertion	-	C	192	274	70.073			-	Insertion
		489245	Deletion	G	-	206	208	99.0385	NP_624786.1:c.632delG	NP_624786.1:p.Arg211fs	Yes	Deletion	SCO0467	hypothetical protein
		606363	SNV	G	T	168	174	96.5517	NP_624876.1:c.193C>A	NP_624876.1:p.Arg65Ser	Yes	G:C>T:A	SCO0563	hypothetical protein
		681473	SNV	C	G	152	155	98.0645	NP_624950.1:c.391G>C	NP_624950.1:p.Glu131Gln	Yes	G:C>C:G	SCO0640	hypothetical protein
		1251111	SNV	G	C	126	132	95.4545	NP_625473.1:c.108G>C		No	G:C>C:G	SCO1183	hypothetical protein
		1562784	SNV	C	G	131	132	99.2424	NP_625746.1:c.737G>C	NP_625746.1:p.Cys246Ser	Yes	G:C>C:G	SCO1465	hypothetical protein
		1670045	SNV	G	T	136	137	99.2701	NP_625836.1:c.628C>A	NP_625836.1:p.Leu210Met	Yes	G:C>T:A	SCO1558	ABC transporter permease
		1765203^1765204	Insertion	-	G	54	89	60.6742			-	Insertion
		1984265	SNV	G	A	155	156	99.359	NP_626119.1:c.244G>A	NP_626119.1:p.Gly82Arg	Yes	G:C>A:T	SCO1851	cob(I)yrinic acid a,c-diamide adenosyltransferase
		1988841	SNV	A	C	103	105	98.0952	NP_626123.1:c.373A>C	NP_626123.1:p.Thr125Pro	Yes	A:T>C:G	SCO1856	precorrin-6Y C5,15-methyltransferase
		2295007	SNV	G	A	172	172	100	NP_626389.1:c.1126G>A	NP_626389.1:p.Gly376Ser	Yes	G:C>A:T	SCO2133	hypothetical protein
		2646572	SNV	A	G	181	182	99.4505	NP_626703.1:c.79T>C		No	A:T>G:C	SCO2460	hypothetical protein
		3008164	SNV	T	A	89	89	100			-	A:T>T:A
		4377204^4377205	Insertion	-	G	106	156	67.9487			-	Insertion
		4564696	SNV	C	G	187	189	98.9418	NP_628325.1:c.117C>G		No	G:C>C:G	SCO4148	ABC transporter ATP-binding protein
		4658248	SNV	G	T	130	130	100	NP_628424.1:c.1348G>T	NP_628424.1:p.Gly450Trp	Yes	G:C>T:A	SCO4250	hypothetical protein
		4880904	SNV	C	T	129	138	93.4783	NP_733638.1:c.71G>A	NP_733638.1:p.Gly24Asp	Yes	G:C>A:T	SCO4458	lipoprotein
		4940282	SNV	A	C	200	202	99.0099	NP_628682.1:c.580T>G	NP_628682.1:p.Trp194Gly	Yes	A:T>C:G	SCO4518	hypothetical protein
		6503843	SNV	G	T	131	132	99.2424	NP_630050.1:c.80C>A	NP_630050.1:p.Pro27His	Yes	G:C>T:A	SCO5933	hypothetical protein
		6597353	SNV	A	T	193	196	98.4694	NP_630127.1:c.312A>T	NP_630127.1:p.Glu104Asp	Yes	A:T>T:A	SCO6014	cationic amino acid transporter
		6826638	SNV	C	T	174	177	98.3051			-	G:C>A:T
		6994242	SNV	G	C	155	161	96.2733	NP_630426.1:c.192C>G		No	G:C>C:G	SCO6334	transcriptional regulator
		7163598	SNV	G	A	189	189	100			-	G:C>A:T
		7198042	SNV	C	A	152	153	99.3464	NP_630588.1:c.111C>A	NP_630588.1:p.Asp37Glu	Yes	G:C>T:A	SCO6506	gas vesicle protein
		7237535	SNV	G	T	127	127	100	NP_630625.1:c.322G>T	NP_630625.1:p.Glu108*	Yes	G:C>T:A	SCO6544	hypothetical protein
		7671689	SNV	G	A	176	176	100	NP_630976.1:c.355G>A	NP_630976.1:p.Val119Met	Yes	G:C>A:T	SCO6907	DNA ligase
		7755660	SNV	C	G	96	101	95.0495	NP_631053.1:c.1125G>C		No	G:C>C:G	SCO6988	oxidoreductase
		7783012	Deletion	G	-	73	73	100	NP_631073.1:c.352delG	NP_631073.1:p.Val118fs	Yes	Deletion	SCO7008	ABC transporter ATP-binding protein
W3	18	466074	SNV	A	C	53	55	96.3636	NP_624768.1:c.85A>C	NP_624768.1:p.Ile29Leu	Yes	A:T>C:G	SCO0447	MarR family regulatory protein
		515777	SNV	C	G	118	119	99.1597	NP_624809.1:c.9144G>C		No	G:C>C:G	SCO0492	peptide synthetase
		1467501	SNV	T	A	146	148	98.6486	NP_625671.1:c.261A>T		No	A:T>T:A	SCO1388	mannose-1-phosphate guanyltransferase
		1765203^1765204	Insertion	-	G	51	84	60.7143			-	Insertion
		1792889	SNV	G	A	117	117	100	NP_625946.1:c.2045G>A	NP_625946.1:p.Arg682Gln	Yes	G:C>A:T	SCO1671	hypothetical protein
		2077625	SNV	G	A	171	173	98.8439			-	G:C>A:T
		2139959	SNV	G	C	101	101	100	NP_626262.1:c.765C>G	NP_626262.1:p.Tyr255*	Yes	G:C>C:G	SCO2001	hypothetical protein
		3137890	SNV	G	A	197	200	98.5	NP_627111.1:c.230G>A	NP_627111.1:p.Arg77Gln	Yes	G:C>A:T	SCO2883	cytochrome P450
		3155674	SNV	G	A	192	193	99.4819	NP_627128.1:c.219C>T		No	G:C>A:T	SCO2902	deoxyribonucleotide triphosphate pyrophosphatase
		3277441	SNV	G	C	198	199	99.4975	NP_627227.1:c.2280C>G	NP_627227.1:p.Asp760Glu	Yes	G:C>C:G	SCO3005	preprotein translocase subunit SecA
		3560736	SNV	G	C	38	75	50.6667	NP_627443.1:c.17402G>C	NP_627443.1:p.Arg5801Pro	Yes	G:C>C:G	SCO3230	CDA peptide synthetase I
		3910675	SNV	G	A	184	184	100	NP_627739.1:c.783C>T		No	G:C>A:T	SCO3541	DNA polymerase III subunit delta'
		4377204^4377205	Insertion	-	G	86	124	69.3548			-	Insertion
		4700228	SNV	C	A	197	198	99.4949	NP_628456.1:c.316G>T	NP_628456.1:p.Gly106Trp	Yes	G:C>T:A	SCO4284	N-acetylglucosamine-6-phosphate deacetylase
		5611647	SNV	C	T	131	131	100	NP_629313.1:c.543G>A		No	G:C>A:T	SCO5165	hydrolase
		6052711	SNV	C	T	140	143	97.9021	NP_629687.1:c.699C>T		No	G:C>A:T	SCO5553	3-isopropylmalate dehydratase large subunit
		6613228	SNV	C	G	157	160	98.125	NP_630137.1:c.2073G>C		No	G:C>C:G	SCO6026	fatty acid oxidation complex alpha-subunit
		7224671	SNV	C	G	104	106	98.1132	NP_630614.1:c.283G>C	NP_630614.1:p.Gly95Arg	Yes	G:C>C:G	SCO6533	nitrate reductase subunit delta NarJ
		7799431	SNV	A	T	176	178	98.8764			-	A:T>T:A
