# Supplementary material for: Mutational meltdown of microbial altruists in Streptomyces coelicolor colonies
Source: Research Square preprint supplement (doi:10.21203/rs.3.rs-101912/v1), 2020-11-23
Supplement: Supplementary file 1 [file 64df89c200d4b2c6d6afeb93.pdf]

## Supplementary materials

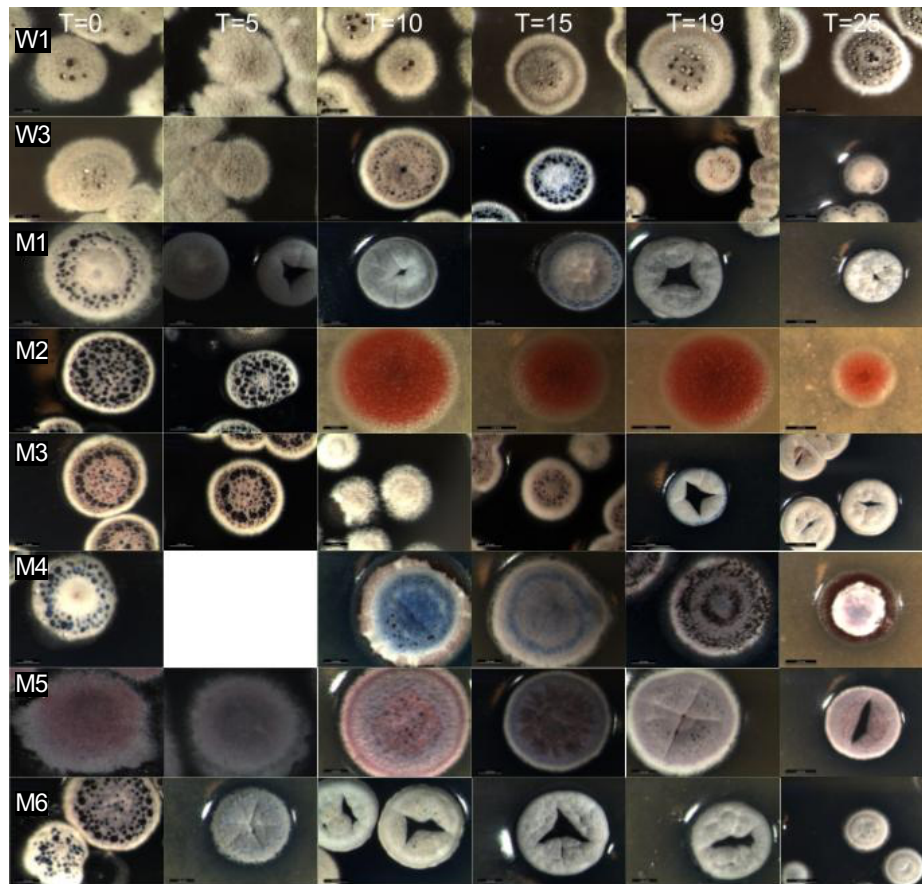

**Fig. S1. Morphology of sampled strains.** Morphogenesis, including aerial growth, sporulation and pigmentation, varies among and within lineages.

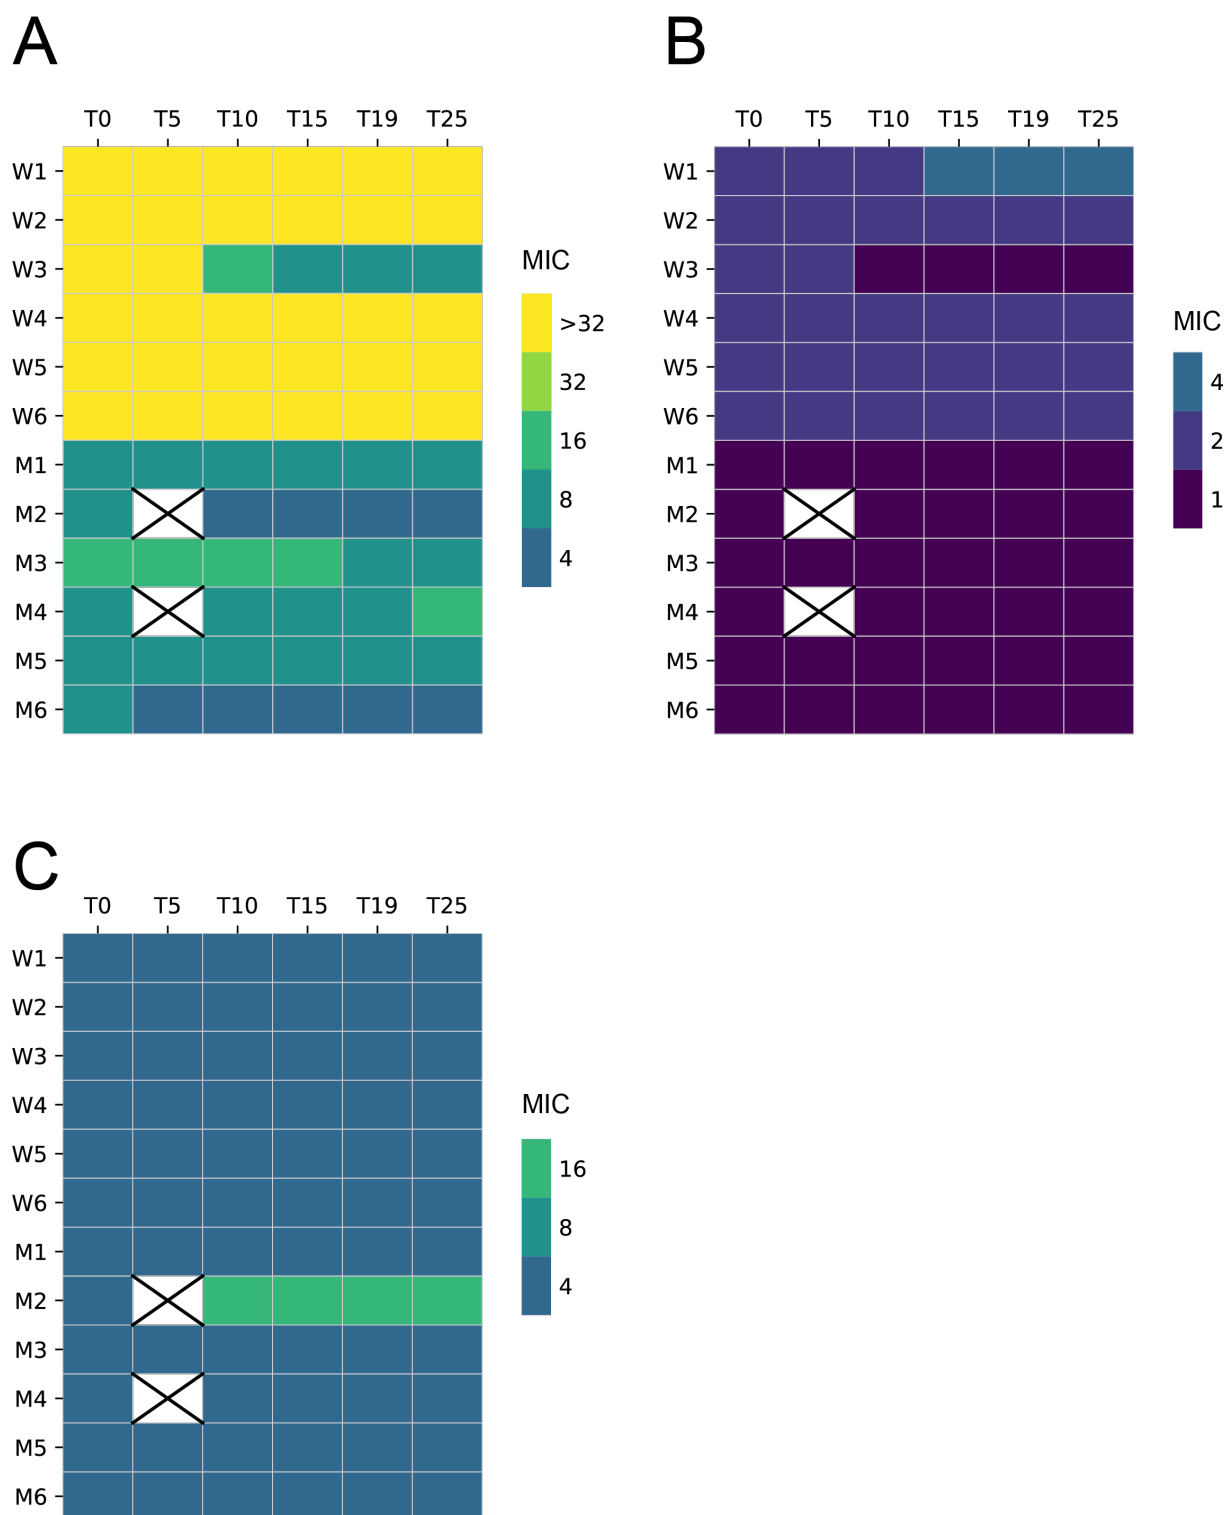

**Fig. S2. Antibiotic resistance of sampled strains.** MIC of (A) oxytetracycline (B) streptomycin or (C) ciprofloxacin. Unit is shown as  $\mu\text{g ml}^{-1}$ .

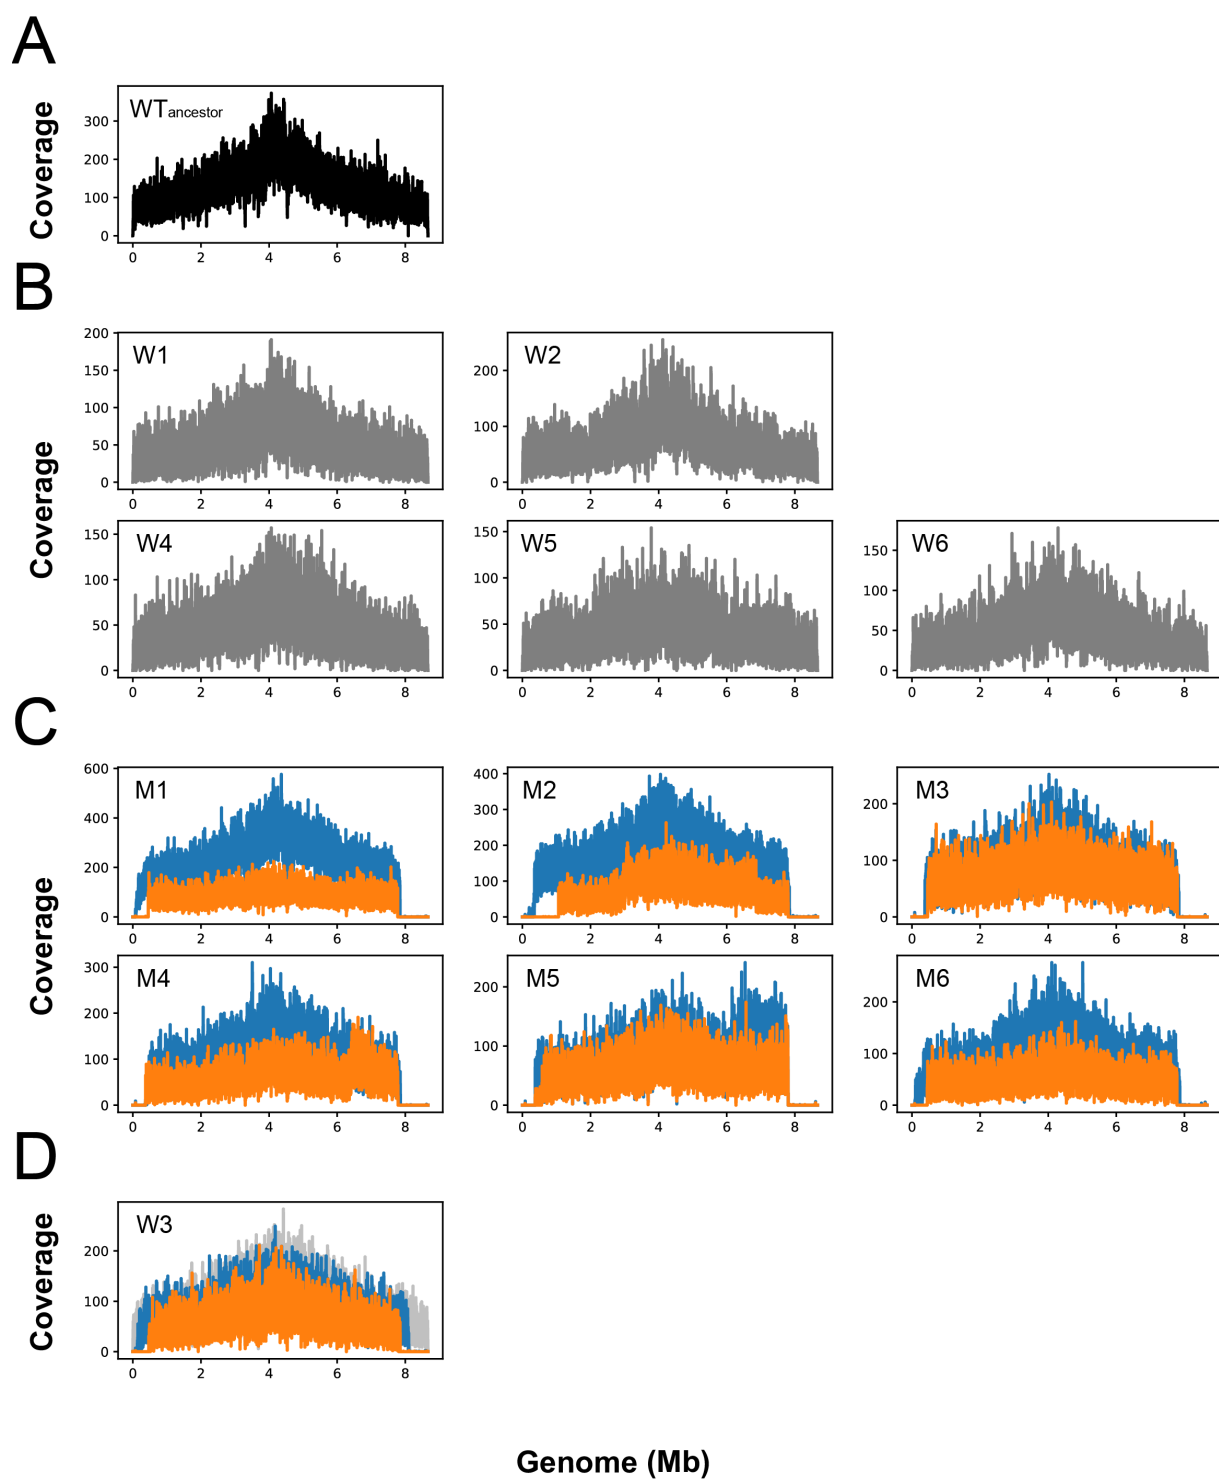

**Fig. S3. Pacbio sequencing results of sampled strains.** Plots indicate the coverage of reads mapped to the *S. coelicolor* M145 reference genome. **(A)** Ancestor WT. **(B)** T25 strains from WT lineages. **(C)** T0 (blue) and T25 (orange) strains from mutant lineages. **(D)** Strains of lineage W3 at T5 (light gray), T7 (blue) and T25 (orange).
